# Membrane tethering potency of Rab-family small GTPases is defined by the C-terminal hypervariable regions

Sanae Ueda, Naoki Tamura, and Joji Mima\*

Institute for Protein Research, Osaka University, Suita, Osaka 565-0871, Japan

\*Correspondence: Joji.Mima@protein.osaka-u.ac.jp

## Abstract

**Membrane tethering is a crucial step to determine the spatiotemporal specificity of secretory and endocytic trafficking pathways in all eukaryotic endomembrane systems. Recent biochemical studies by a chemically-defined reconstitution approach reveal that, in addition to the structurally-diverse classic tethering factors such as coiled-coil tethering proteins and multisubunit tethering complexes, Rab-family small GTPases also retain the inherent membrane tethering functions to directly and physically bridge two distinct lipid bilayers by themselves. Although Rab-mediated membrane tethering reactions are fairly efficient and specific in the physiological context, its mechanistic basis is yet to be understood. Here, to explore whether and how the intrinsic tethering potency of Rab GTPases is controlled by their C-terminal hypervariable region (HVR) domains that link the conserved small GTPase domains (G-domains) to membrane anchors at the C-terminus, we quantitatively compared tethering activities of two representative Rab isoforms in humans (Rab5a, Rab4a) and their HVR-deleted mutant forms. Strikingly, deletion of the HVR linker domains enabled both Rab5a and Rab4a isoforms to drastically enhance their intrinsic tethering potency, exhibiting 5- to 50-fold higher initial velocities of tethering for the HVR-deleted mutants than those for the full-length, wild-type Rabs. Furthermore, we revealed that the tethering activity of full-length Rab5a was significantly reduced by the omission of anionic lipids and cholesterol from membrane lipids and, however, membrane tethering driven by HVR-deleted Rab5a mutant was completely insensitive to the headgroup composition of lipids. In conclusion, our current findings establish that the non-conserved, flexible C-terminal HVR linker domains define membrane tethering potency of Rab-family small GTPases through controlling the close attachment of the globular G-domains to membrane surfaces, which confers the active tethering-competent state of the G-domains on lipid bilayers.**

**Keywords:** Rab GTPase, small GTPase, hypervariable region, membrane tethering, membrane trafficking, reconstitution, liposome

## Introduction

All eukaryotic cells, from a unicellular yeast to human cells, organize the complex but highly-regulated endomembrane systems, in which diverse cellular components including proteins and lipids are selectively delivered to their correct destinations, such as subcellular organelles, the plasma membrane, or the extracellular space, through secretory and endocytic trafficking pathways (Bonifacino and Glick, 2004). Membrane tethering is a reversible process of the initial physical contact between membrane-bound, cargo-loaded transport carriers (e.g., secretory and endocytic vesicles) and their target subcellular compartments (Pfeffer, 1999; Waters and Pfeffer, 1999; Waters and Hughson, 2000). The process of membrane tethering is vital for determining the spatiotemporal specificity of intracellular membrane trafficking, before the irreversible final steps of membrane docking and fusion mediated by SNARE-family proteins (Jahn and Scheller, 2006), which are another critical layers to confer the fidelity of membrane trafficking (McNew et al., 2000; Parlati et al., 2002; Izawa et al., 2012; Furukawa and Mima, 2014). A large body of prior studies on membrane tethering or vesicle tethering (or capture) have identified a number of the protein components essential for membrane tethering (Yu and Hughson, 2010; Kuhlee et al., 2015; Cheung and Pfeffer, 2016; Spang, 2016; Witkos and Lowe, 2016; Gillingham and Munro, 2019), which include the Uso1/p115 coiled-coil protein (Sapperstein et al., 1995; Sapperstein et al., 1996; Barlowe, 1997; Cao et al., 1998), golgin-family coiled-coil proteins (Drin et al., 2008; Wong and Munro, 2014; Cheung et al., 2015), the EEA1 coiled-coil protein (Murray et al., 2016), and a diversified set of multisubunit tethering complexes, such as the HOPS complex (Price et al., 2000; Stroupe et al., 2009; Hickey and Wickner, 2010; Ho and Stroupe, 2015; Ho and Stroupe, 2016), the exocyst complex (TerBush et al., 1996; Guo et al., 1999; Rossi et al., 2020), the COG complex (Ungar et al., 2002; Zolov and Lupashin, 2005; Shestakova et al., 2006), the Dsl1 complex (Reilly et al., 2001; Zink et al., 2009; Ren et al., 2009), the GARP complex (Conibear and Stevens, 2000; Perez-Victoria et al., 2008; Perez-Victoria and Bonifacino, 2009), and the TRAPP complex (Sacher et al., 2001; Cai et al., 2005; Cai et al., 2007). It is noteworthy that, in addition to these miscellaneous, sequentially- and structurally-diverse

## HVR controls Rab-mediated membrane tethering

classic tethering factors, our recent reconstitution studies have established the inherent tethering functions of human Rab-family small GTPases (Tamura and Mima, 2014; Inoshita and Mima, 2017; Mima, 2018; Segawa et al., 2019), following the pioneering work of Merz and colleagues, which reported for the first time the intrinsic tethering activity of endosomal Ypt/Rab-family proteins in the yeast *Saccharomyces cerevisiae* (Lo et al., 2012).

Using the chemically-defined reconstitution system with purified proteins of putative membrane tethers or tethering factors and synthetic liposomes for a model lipid membrane, which is known as the most valid experimental approach to investigating whether or not the protein components of interest act as a *bona fide* membrane tether (Brunet and Sacher, 2014; Mima, 2018), comprehensive analyses of human Rab-family GTPases demonstrated their intrinsic membrane tethering potency to physically link two distinct lipid bilayers by themselves, even in the absence of any other tethering factors previously identified (Tamura and Mima, 2014; Inoshita and Mima, 2017; Mima, 2018; Segawa et al., 2019). Experimental evidence from the reconstitution studies further confirmed the efficiency and specificity of Rab-mediated membrane tethering in the physiological context: (1) A number of representative human Rab-family isoforms can efficiently drive tethering at a physiologically-relevant level of the Rab protein densities on membrane surfaces (Tamura and Mima, 2014; Inoshita and Mima, 2017; Segawa et al., 2019); (2) reversible membrane tethering is exclusively mediated by *trans*-assembly of the membrane-anchored forms of Rab proteins (Tamura and Mima, 2014; Inoshita and Mima, 2017; Segawa et al., 2019); (3) efficient tethering can be driven by specific heterotypic combinations of different Rab isoforms, such as the pair of Rab1a and Rab9a (Segawa et al., 2019); and (4) Rab11a and its cognate effector proteins, class V myosins, specifically cooperate to trigger rapid membrane tethering in a GTP-dependent manner (Inoshita and Mima, 2017). However, in spite of these research advances, the mechanistic basis of Rab-driven membrane tethering reactions remains poorly understood. In this study, by quantitatively analyzing the membrane tethering capacities of human endosomal Rabs (Rab5a and Rab4a) and their mutant forms lacking the C-terminal hypervariable region (HVR) domains that link a conserved small GTPase domain to a membrane anchor at the C-terminus, we uncovered that deletion of the HVR linkers allows Rab proteins to drastically enhance their intrinsic tethering potency, establishing the essential role of the non-conserved flexible HVR linkers in controlling Rab-mediated membrane tethering.

## Materials and Methods

### Protein expression and purification

Bacterial expression vectors for the full-length proteins of human Rab5a (amino acid residues, Met1-Asn215; UniProtKB: P20339) and Rab4a (amino acid residues, Met1-Cys218; UniProtKB: P20338) and their mutant forms lacking the HVR linkers, Rab5a $\Delta$ HVR (amino acid residues, Met1-Pro182) and Rab4a $\Delta$ HVR (amino acid residues, Met1-Leu175), were constructed using a pET-41 Ek/LIC vector kit (Novagen) (Figure 1), as described (Tamura and Mima, 2014; Inoshita and Mima, 2017; Segawa et al., 2019). DNA fragments encoding these wild-type and mutant proteins of human Rabs and the additional sequences for a human rhinovirus 3C protease-cleavage site (Leu-Glu-Val-Leu-Phe-Gln-Gly-Pro) at the N-terminus and for a polyhistidine tag (His12) at the C-terminus were amplified by PCR using KOD-Plus-Neo polymerase (Toyobo) and Human Universal QUICK-Clone cDNA II (Clontech) for a template cDNA and then cloned into a pET-41 Ek/LIC vector (Novagen). Recombinant proteins of Rab5a-His12, Rab5a $\Delta$ HVR-His12, Rab4a-His12, Rab4a $\Delta$ HVR-His12, and untagged Rab4a $\Delta$ HVR (Figure 1) were expressed in *Escherichia coli* BL21(DE3) cells (Novagen) harboring the pET-41-based vectors constructed. After inducing protein expression by adding IPTG (0.2 mM final, 37°C, 3 hours), cultured cells were harvested, resuspended with the RB150 buffer (20 mM Hepes-NaOH, pH 7.4, 150 mM NaCl, 10% glycerol) containing 0.1 mM GTP, 5 mM MgCl<sub>2</sub>, 1 mM DTT, 1 mM PMSF, and 1  $\mu$ g/ml pepstatin A, freeze-thawed in liquid nitrogen and a water bath at 30°C, lysed by sonication, and ultracentrifuged with a 70 Ti rotor (Beckman Coulter; 50,000 rpm, 75 min, 4°C). Supernatants after ultracentrifugation were mixed with COSMOGEL GST-Accept beads (Nacalai Tesque) and incubated with gentle agitation (4°C, 2 hours). The protein-bound beads were washed four times in RB150 containing 5 mM MgCl<sub>2</sub> and 1 mM DTT, resuspended in the same buffer, supplemented with human rhinovirus 3C protease (8 units/ml; Novagen), and incubated without agitation (4°C, 16 hours). Purified Rab proteins, which had only three extra residues (Gly-Pro-Gly) at the N-terminus, were eluted from the beads after proteolytic cleavage and analyzed by SDS-PAGE and CBB staining (Figure 1). Concentrations of purified Rab proteins were determined using Protein Assay CBB Solution (Nacalai Tesque) and BSA as a standard protein.

### Liposome preparation

For preparing synthetic protein-free liposomes, all of the non-fluorescent lipids used, including POPC (1-palmitoyl-2-oleoyl-phosphatidylcholine), POPE (1-palmitoyl-2-oleoyl-phosphatidylethanol), bovine liver PI (phosphatidylinositol), POPS (1-palmitoyl-2-oleoyl-phosphatidylserine), ovine wool cholesterol, and DOGS-NTA (1,2-dioleoyl-sn-glycero-3-[[N-(5-amino-1-carboxypentyl) iminodiacetic acid]-succinyl]), were purchased from Avanti Polar Lipids, and the two

## HVR controls Rab-mediated membrane tethering

fluorescence-labeled lipids used, Rh-PE (rhodamine-PE) and FL-PE (fluorescein-PE), were from Molecular Probes. Lipids were mixed in chloroform with the lipid compositions of 41% (mol/mol) POPC, 17% POPE, 10% liver PI, 5% POPS, 20% ovine cholesterol, 6% DOGS-NTA, and 1% Rh-PE or FL-PE. After evaporating chloroform with a stream of nitrogen gas, dried lipid mixes were resuspended in RB150 containing 5 mM MgCl<sub>2</sub> and 1 mM DTT by vortexing (final 8 mM total lipids), incubated with agitation (37°C, 1 hour), freeze-thawed in liquid nitrogen and a water bath at 30°C, and extruded 25 times through polycarbonate filters (pore diameters, 200 nm; Avanti Polar Lipids) in a mini-extruder (Avanti Polar Lipids) preheated at 40°C. The liposome solutions prepared were stored at 4°C and used within a week for all of the current reconstitution experiments.

### Liposome turbidity assay

To quantitatively evaluate the intrinsic capacities of human Rab-family small GTPases to physically tether two distinct lipid membranes, turbidity changes of liposome solutions in the presence of purified Rab proteins were monitored by measuring optical density at 400 nm, as described (Tamura and Mima, 2014; Inoshita and Mima, 2017; Mima, 2018; Segawa et al., 2019). Liposome solutions (200-nm diameter; 1 mM total lipids in final) and purified Rab-His12 proteins (final 0.2-10 μM), which had been preincubated separately at 30°C for 5 min, were mixed in RB150 containing 5 mM MgCl<sub>2</sub> and 1 mM DTT, transferred to a 10-mm path-length cuvette (105.201-QS, Hellma Analytics), and immediately subjected to measurement of the optical density changes at 400 nm ( $\Delta OD_{400}$ ) in a DU720 spectrophotometer (Beckman Coulter) for 5 min with 10-sec intervals at room temperature. The  $\Delta OD_{400}$  data obtained from the kinetic turbidity assays were analyzed by curve fitting using the ImageJ2 software (National Institutes of Health) and the logistic function formula,  $y = a/(1+b*\exp(-c*x))$ , where  $y$  and  $x$  correspond to the  $\Delta OD_{400}$  value and the time (min), respectively (Segawa et al., 2019; Taniguchi et al., 2020). The maximum capacities of Rab-mediated liposome tethering were defined as the theoretical maximum  $\Delta OD_{400}$  values of the fitted sigmoidal curves at  $t = \infty$  and thus calculated as “ $a$ ” from the logistic formula above. In addition, the initial velocities of liposome tethering were defined as the maximum slopes of the fitted curves and calculated as “ $c*a/4$ ” from the formula above. Means and standard deviations of the tethering capacities and velocities were determined from three independent experiments. The turbidity data were statistically evaluated using one-way ANOVA in SigmaPlot 11 (Systat Software). All of the kinetic plots shown in the turbidity assays were obtained from one experiment and were typical of those from more than three independent experiments.

### Fluorescence microscopy

Fluorescence microscopy-based imaging assays for Rab-mediated liposome tethering were performed using a LUNA-FL automated fluorescence cell counter (Logos Biosystems), as described (Segawa et al., 2019; Taniguchi et al., 2020). Liposomes bearing fluorescence-labeled Rh-PE or FL-PE lipids (200-nm diameter; final 2 mM total lipids) and Rab-His12 proteins (final 0.5-8 μM), which had been separately preincubated (30°C, 10 min), were mixed in RB150 with 5 mM MgCl<sub>2</sub> and 1 mM DTT, incubated without agitation (30°C, 2 hours), and then applied to a LUNA cell-counting slide (L12001, Logos Biosystems; 15 μl per well). Bright field images, Rh-fluorescence images, and FL-fluorescence images of the Rab-mediated liposome tethering reactions in the slides were obtained and processed by the LUNA-FL cell counter. Particle sizes of Rab-dependent liposome clusters observed in the fluorescence images were analyzed using the ImageJ2 software with setting the lower intensity threshold level to 150, the upper intensity threshold level to 255, and the minimum particle size to 10 pixel<sup>2</sup> which corresponds to approximately 10 μm<sup>2</sup> (Segawa et al., 2019; Taniguchi et al., 2020).

## Results and Discussion

Rab-family small GTPases constitute the largest branch of the Ras superfamily, which includes 11 Ypt/Rab proteins in budding yeast and more than 60 Rab isoforms in humans (Rojas et al., 2012). In general, Rab proteins from all eukaryotes are a small monomeric protein of approximately 25 kDa and are comprised of the Ras superfamily small GTPase domain (G-domain; 160-170 residues), which can specifically associate with the cognate interacting proteins (or protein complexes) called “Rab effectors” in a GTP-dependent manner to mediate the multiple steps of intracellular membrane trafficking as a molecular switch (Zerial and McBride, 2001; Stenmark, 2009; Hutagalung and Novick, 2011), and also two other non-conserved regions adjacent to the conserved globular G-domain (Khan and Ménétrey, 2013; Pylypenko et al., 2018; Mima, 2018), which include the flexible N-terminal segment (5-30 residues) and the unstructured C-terminal HVR domain (20-50 residues) that was involved in selective interaction with the guanine nucleotide exchange factors (Thomas et al., 2019). Notably, in addition to these conventional structural and functional features of Rab-family GTPases (Zerial and McBride, 2001; Stenmark, 2009; Hutagalung and Novick, 2011), recent reconstitution studies have revealed their novel molecular functions to directly and physically tether lipid membranes by themselves (Lo et al., 2012; Tamura and Mima, 2014; Inoshita and Mima, 2017; Mima, 2018; Segawa et al., 2019). Our comprehensive experiments for 11 representative human Rab isoforms (Rab1a, -3a, -4a, -5a, -6a, -7a, -9a, -11a, -14, -27a, and -33b) demonstrated that the intrinsic

## HVR controls Rab-mediated membrane tethering

tethering capacities are highly conserved among all of the Rabs tested, except for Rab27a, and are achieved exclusively through *trans*-assembly between membrane-anchored Rab proteins in homotypic and heterotypic Rab combinations (Inoshita and Mima, 2017; Segawa et al., 2019). Here, based on the earlier findings above by an *in vitro* reconstitution approach, we further explored molecular mechanisms by which Rab proteins confer efficiency and specificity of their tethering activities, particularly focusing on the roles of the C-terminal HVR flexible linkers that connect the globular G-domains to membrane surfaces.

### Deletion of the HVR linkers drastically enhances the intrinsic tethering potency of human Rab proteins

For thoroughly comparing the intrinsic tethering activities of the full-length, wild-type form and the HVR-deleted mutant form of Rab-family proteins, we selected the two human Rab isoforms, Rab5a and Rab4a, as a typical model among over 60 Rab members in human cells (Figure 1). These two Rab isoforms, which are both principally localized at the cytoplasmic face of early endosomal membranes (Zerial and McBride, 2001; Stenmark, 2009; Hutagalung and Novick, 2011), exhibit more than 40% sequence identity with their G-domains, but they have little or no conserved sequence or motif in their HVR linker domains (Figure 1A). It is also noteworthy that early endosomal Rab5a and Rab4a proteins were found to be typical of a highly-potent membrane tether and an inefficient membrane tether, respectively (Inoshita and Mima, 2017; Segawa et al., 2019).

As tested in our prior works on Rab-mediated tethering, recombinant proteins of full-length Rab5a, Rab4a, and their HVR-deleted mutants (denoted as Rab5a $\Delta$ HVR and Rab4a $\Delta$ HVR) were purified in the C-terminally-modified forms with an artificial His12 tag (Figure 1B, C), which allows purified Rab proteins to stably associate with lipid bilayers of synthetic liposomes bearing a DOGS-NTA lipid (Figure 2A), mimicking membrane attachment of native Rab proteins via an isoprenyl lipid anchor at the C-terminus (Mima, 2018). Liposomes used in the current reconstitution systems were prepared by an extrusion method with a 200-nm pore-size filter (Figure 2A), yielding the curvature of lipid bilayers roughly similar to that of early endosomal membranes in mammalian cells, which were shown to be approximately 100-500 nm in diameter (Klumperman and Raposo, 2014). Regarding the lipid composition, the extruded 200-nm liposomes bore five major lipid species, including PC, PE, PI, PS, and cholesterol (Figure 2A), which primarily compose organelle membranes in mammals (van Meer et al., 2008; Vance, 2015; Yang et al., 2018).

Under the physiologically-relevant conditions, the kinetic turbidity assays for liposome tethering were employed with

full-length and HVR-deleted Rab5a (Figure 2B-D) and Rab4a (Figure 2E-G) to analyze the tethering capacities at a broad range of the Rab protein-to-lipid ratios, from 1:5,000 to 1:100 (mol/mol). Strikingly, the current liposome tethering assays uncovered that both Rab5a and Rab4a isoforms can greatly stimulate the intrinsic tethering activities by removal of their HVR linker domains that are located between the G-domains and C-terminal membrane anchors (Figure 2B, E). In the case of Rab5a, which had been reported to be the most tethering-competent isoform among human Rab-family proteins tested (Tamura and Mima, 2014; Inoshita and Mima, 2017; Segawa et al., 2019), Rab5a $\Delta$ HVR mutant exhibited over 5-fold higher maximum tethering capacities and up to 15-fold higher initial tethering velocities than those values for wild-type Rab5a (Figure 2C, D). Likewise, the HVR-deleted mutant of Rab4a (Rab4a $\Delta$ HVR) exhibited the very high tethering potency comparable to that of Rab5a $\Delta$ HVR (Figure 2B, E), yielding more than 10-fold higher maximum tethering capacities (Figure 2F) and over 40-fold higher initial tethering velocities (Figure 2G) compared to full-length Rab4a that showed little tethering activities under the current conditions with the 200-nm liposomes (Figure 2E-G).

Considering the physiological Rab-to-lipid molar ratio (1:560, mol/mol; Figure 2C, D, F, G, red dashed lines), which was calculated as described (Inoshita and Mima, 2017; Segawa et al., 2019) using the average copy number of Rab proteins in synaptic vesicles (25 Rab molecules per vesicle; Takamori et al., 2006), the mean diameter of synaptic vesicles (42 nm; Takamori et al., 2006), the typical thickness of biological membranes (4 nm; Nagle and Tristram-Nagle, 2000), and the average surface area of phospholipid headgroups (0.65 nm<sup>2</sup>; Nagle and Tristram-Nagle, 2000), kinetic data of the reconstituted tethering assays further demonstrated that the HVR-deleted forms of both Rab5a and Rab4a have the intrinsic potency to drive rapid and efficient tethering of liposomal membranes at the physiologically-relevant Rab protein densities on membrane surfaces and even at much lower Rab densities, such as the Rab-to-lipid molar ratio of 1:2,000 (mol/mol; Figure 2B-G). It should also be noted that, assuming that Rab molecules are a spherical 25-kDa protein with a radius of 2.0 nm (Erickson, 2009), membrane-bound Rab proteins occupy only 1.9% of the outer surface areas of the 200-nm liposomes when tested at the 1:2,000 Rab-to-lipid ratio. Thus, this reflects that membrane tethering driven by HVR-deleted Rabs is a highly robust and specific biochemical reaction in the physiological context and is quite unlikely to be caused by non-selective protein-protein or protein-lipid interactions on membrane surfaces.

Microscopic observations of fluorescence-labeled liposome clusters induced by membrane-anchored Rab proteins, as an alternative assay for Rab-mediated membrane tethering,

## HVR controls Rab-mediated membrane tethering

provided further experimental evidence of the remarkably high tethering potency of the HVR-deleted forms of human Rab-family proteins (**Figure 3**). To comprehensively evaluate the intrinsic capacities of full-length and HVR-deleted Rab5a and Rab4a proteins to induce the formation of massive clusters of fluorescent Rh-PE-bearing liposomes (**Figure 3A**), the wide-field Rh-fluorescence images of the Rab-mediated liposome tethering reactions, which had been incubated (2 hours) with the Rh-PE-bearing 200-nm liposomes and Rab5a (**Figure 3B**), Rab5a $\Delta$ HVR (**Figure 3C**), Rab4a (**Figure 3G**), or Rab4a $\Delta$ HVR (**Figure 3H**), were acquired using a LUNA-FL fluorescence cell counter and a LUNA cell-counting slide. The current imaging assays for liposome tethering allowed us to simultaneously observe large numbers of the Rab-induced liposome clusters formed in a defined volume (length  $\times$  width  $\times$  height = 2,500  $\times$  2,000  $\times$  100  $\mu$ m), thereby unbiasedly and quantitatively measuring their particle numbers (**Figure 3D, I**), average particle sizes (**Figure 3E, J**), and total particle areas (**Figure 3F, K**). Consistent with the results from the kinetic turbidity assays (**Figure 2B-G**), both Rab5a $\Delta$ HVR and Rab4a $\Delta$ HVR mutant proteins were able to trigger highly efficient liposome tethering in the imaging assays, yielding more than 400 detectable particles of Rh-labeled liposome clusters (**Figure 3D, I**) with the average sizes above 700  $\mu$ m<sup>2</sup> (**Figure 3E, J**) in the Rh-fluorescence images obtained (**Figure 3C-F, Figure 3H-K**). Notably, when assayed at the Rab-to-lipid molar ratios of 1:2,000 (final 1  $\mu$ M Rabs and 2 mM lipids), these HVR-deleted Rab proteins yielded the total areas of liposome clusters ranging from 300,000 to 500,000  $\mu$ m<sup>2</sup> (**Figure 3F, K**), whereas full-length Rab5a and Rab4a proteins were almost incompetent to initiate efficient liposome tethering under the conditions (**Figure 3B, G**), giving only 1,000 to 2,000  $\mu$ m<sup>2</sup> for the total particle areas (**Figure 3F, K**). In addition to these findings on very high tethering potency of the HVR-deleted mutants of Rab5a and Rab4a (**Figures 2, 3**), it should also be noted that, although full-length Rab5a exhibited its adequate tethering potency at the Rab-to-lipid molar ratios of 1:1,000 and 1:500 in the microscopic assays, it turned out to be totally inactive at the higher Rab-to-lipid ratio of 1:250 (**Figure 3B, D-F**). This appears to be puzzling but perhaps reflects that full-length Rab5a is prone to assemble into a homo-dimeric complex in the *cis*-configuration at such high Rab densities, preventing the protein assemblies in *trans* between two opposing membranes, while the HVR-deleted proteins still rather assemble into the *trans*-complexes under the same conditions.

### Requirement of *trans*-assembly of HVR-deleted Rab proteins in reversible membrane tethering reactions

Next, we further employed the microscopic imaging assays for liposome clustering to ask whether membrane tethering mediated by HVR-deleted Rab mutant proteins is a non-

fusogenic, reversible tethering reaction (**Figure 4**) and also whether *trans*-assembly between membrane-anchored Rab proteins is certainly required for the tethering events driven by HVR-deleted Rabs (**Figure 5**), as previously established for full-length wild-type Rabs (Tamura and Mima, 2014; Inoshita and Mima, 2017; Segawa et al., 2019). To test reversibility of the tethering reactions with Rab4a $\Delta$ HVR-His12 proteins and DOGS-NTA-bearing fluorescent liposomes (**Figure 4**), large clusters of Rab4a $\Delta$ HVR-anchored liposomes, which had been pre-formed during the first incubation (1 hour), were supplemented with imidazole (250 mM), which acts as a competitive inhibitor to block the membrane association of Rab-His12 proteins, or with the buffer control, further incubated (1 hour), and then subjected to fluorescence microscopy (**Figure 4A**). Obviously, although a number of huge Rh-labeled liposome clusters were still present in the reaction incubated with the buffer control (the total particle area of 410,000  $\mu$ m<sup>2</sup>; **Figure 4B**), addition of imidazole caused untethering of liposome clusters and completely abolished detectable Rh-labeled particles (the total particle area of 2,000  $\mu$ m<sup>2</sup>; **Figure 4C**). These results demonstrated reversible membrane tethering mediated by HVR-deleted Rab proteins that can be strictly controlled by the Rab attachment and detachment cycles on membrane surfaces, consistent with the earlier experimental evidence for the reversibility of tethering between yeast vacuoles (Mayer and Wickner, 1997; Ungermann et al., 1998) and tethering between full-length Rab-anchored liposomes (Tamura and Mima, 2014).

For exploring the requirement of Rab-Rab assemblies in *trans* during HVR-deleted Rab-mediated tethering, we performed the same microscopic assays but using two types of the fluorescence-labeled DOGS-NTA-liposomes which bore either Rh-PE or FL-PE (**Figure 5**). As expected, massive liposome clusters induced by Rab4a $\Delta$ HVR-His12 proteins contained both of the Rh-PE-liposomes (**Figure 5A**, middle panel) and FL-PE-liposomes (**Figure 5A**, right panel), yielding 490,000  $\mu$ m<sup>2</sup> for the total particle area of the Rh-labeled clusters that entirely overlapped with the FL-labeled clusters. However, by omitting DOGS-NTA from the FL-PE-liposomes, HVR-deleted Rab4a no longer had the capacity to form large FL-labeled clusters (**Figure 5B**, right panel), only inducing the Rh-labeled liposome clusters (**Figure 5B**, middle panel; the total particle area of 140,000  $\mu$ m<sup>2</sup>). Moreover, the omission of DOGS-NTA from both fluorescence-labeled liposomes completely abrogated the intrinsic tethering activity of Rab4a $\Delta$ HVR-His12 proteins (**Figure 5C**). These data clearly establish that highly efficient membrane tethering driven by HVR-deleted Rab proteins requires their membrane-bound forms on both opposing membranes, thus reflecting the need for *trans*-Rab-Rab assemblies to bridge two distinct lipid bilayers destined to be tethered.

## HVR controls Rab-mediated membrane tethering

Specific *trans*-assembly of the membrane-anchored form of HVR-deleted Rab proteins during reconstituted membrane tethering was further investigated by employing liposome turbidity assays in the presence of untagged Rab4a $\Delta$ HVR that lacks a His12 tag at the C-terminus (Figure 6). Before initiating Rab-dependent liposome tethering by mixing with DOGS-NTA-bearing liposomes, Rab4a $\Delta$ HVR-His12 was pre-incubated (10 min) with an up to 10-fold molar excess of untagged Rab4a $\Delta$ HVR that potentially inhibits the *trans*-interactions between membrane-bound Rab4a $\Delta$ HVR-His12 proteins (Figure 6A). Nevertheless, the presence of excess untagged Rab4a $\Delta$ HVR proteins in solution had little effect on the tethering capacity of membrane-bound Rab4a $\Delta$ HVR-His12 proteins (Figure 6B, see the  $\Delta$ OD400 values at 300 sec), even though the initial rates of tethering were slightly reduced by the addition of untagged Rab4a $\Delta$ HVR (Figure 6B), suggesting the weak interactions between untagged Rab4a $\Delta$ HVR and Rab4a $\Delta$ HVR-His12 that prevent rapid Rab-Rab assemblies in *trans*. These results lead us to conclude that rapid and efficient membrane tethering driven by HVR-deleted Rab proteins are achieved by highly selective *trans*-Rab-Rab interactions, distinguishing membrane-bound Rabs from the membrane-unbound soluble forms.

### Effects of membrane lipids on membrane tethering functions of full-length and HVR-deleted Rab proteins

The current reconstitution experiments with the full-length and HVR-deleted forms of human Rab-family small GTPases established that deletion of the C-terminal HVR domains can drastically enhance the intrinsic tethering potency of human Rab proteins (e.g., endosomal Rab5a and Rab4a) to trigger reversible membrane tethering mediated by highly selective Rab-Rab protein assemblies in *trans* (Figures 2-6). Since the HVR domains are a 20-50 residue long flexible linker that connects the G-domain to a membrane anchor at the C-terminus (Khan and Ménétrey, 2013; Mima, 2018; Figure 1, Figure 2A), removal of the HVR linkers greatly shortens the distance between the globular G-domains and membranes when anchored to lipid bilayers, allowing the G-domains to be placed in close contact with membrane surfaces. Thus, the present data shown in Figures 2-6 faithfully reflect that the close membrane attachment of the Rab G-domains is an essential process to promote rapid and efficient *trans*-Rab-Rab assemblies on two opposing membranes destined to be stably tethered.

To further understand the active “tethering-competent” mode of the Rab G-domains that are closely attached to membrane surfaces, we next examined the effects of lipids on Rab- or Rab G-domain-mediated membrane tethering by performing liposome turbidity assays for full-length Rab5a and HVR-deleted Rab5a (Rab5a $\Delta$ HVR) with the two different lipid compositions; the physiologically-mimicking complex

composition bearing PC, PE, PI, PS, and cholesterol, which was used as the standard in Figures 2-6 and termed here “complete” (Figure 7A), and the non-physiological simple composition bearing PC and PE only, termed “PC/PE” (Figure 7A). Strikingly, when tested for full-length Rab5a (final 10  $\mu$ M, the Rab-to-lipid ratios of 1:100; Figure 7B), its intrinsic tethering activity was significantly diminished by omitting two anionic lipid species (PI and PS) and cholesterol from liposomes (Figure 7B, left panel), giving the maximum tethering capacities ( $\Delta$ OD400) of  $0.67 \pm 0.037$  with the complete liposomes but  $0.35 \pm 0.034$  with the PC/PE liposomes (Figure 7B, right panel). However, intriguingly, HVR-deleted Rab5a mutant (final 1  $\mu$ M, the Rab-to-lipid ratios of 1:1,000; Figure 7C) exhibited almost or completely identical tethering kinetics (Figure 7C, left panel) and tethering capacities (Figure 7C, right panel) with these two “complete” and “PC/PE” types of liposomes, establishing that the tethering potency of the hyperactive HVR-deleted Rab5a is fully independent of the headgroup composition of lipid bilayers. These results indicate that the HVR linkers, not the G-domains, act as a primary region to interact with the hydrophilic lipid headgroups, thereby guiding the G-domain towards its active tethering-competent state on the membrane surface in the case of Rab5a (Figure 7B) or, by contrast, negatively regulating the membrane attachment of the G-domain in the case of Rab4a, which was a quite inefficient membrane tether in its full-length form but found to be a very highly potent tether in the HVR-deleted mutant form (Figures 2-3). Furthermore, considering that the HVR deletion allows the Rab G-domain to be in close contact with membrane lipids but simultaneously insensitive to the lipid headgroup composition in the tethering assays (Figure 7C), specific hydrophobic interactions between the acyl chains of membrane lipids and the nonpolar surface areas of the Rab G-domains likely induce the proper membrane orientations and suitable structures for achieving rapid and efficient Rab-driven tethering of lipid bilayers.

### Conclusions

By comprehensively and quantitatively investigating the intrinsic membrane tethering potency of human endosomal Rab-family small GTPases (Rab5a, Rab4a) and their mutant forms lacking the C-terminal HVR domains (Rab5a $\Delta$ HVR, Rab4a $\Delta$ HVR) in a chemically-defined reconstitution system (Figures 2-7), the present studies provide novel insights into the mechanistic basis of membrane tethering reactions driven by Rab small GTPases: (1) Close attachment of the globular G-domains to membrane surfaces is a vital step to fully activate the intrinsic potency of Rab proteins to trigger selective *trans*-Rab-Rab assemblies and subsequently drive efficient membrane tethering reactions; (2) the HVR linkers control, either positively or negatively, the close membrane attachment of the G-domains through the interactions

## HVR controls Rab-mediated membrane tethering

between the polar residues in HVRs and the headgroups of membrane lipids; and (3) the active “tethering-competent” state of the G-domains closely attached onto membrane surfaces is completely insensitive to the composition of lipid headgroups, suggesting the importance of the hydrophobic interactions between the G-domain surfaces and the non-polar regions of membrane lipids. Finally, based on the current findings, future studies will focus on deciphering the protein-protein and protein-lipid interfaces in the Rab G-domains during *trans*-Rab-Rab assembly and Rab-mediated membrane tethering.

## Author contributions

JM designed the research. JM, SU, and NT performed the experiments. JM, SU, and NT analyzed the data. JM wrote the manuscript.

## Acknowledgements

We thank Megumi Shinguu and Kazuya Segawa (Institute for Protein Research, Osaka University) for their contributions to preparation of recombinant proteins of human Rabs. This study was in part supported by the Program to Disseminate Tenure Tracking System from the Ministry of Education, Culture, Sports, Science and Technology, Japan (MEXT) and Grants-in-Aid for Scientific Research from MEXT (to JM).

## References

- Barlowe, C. (1997). Coupled ER to Golgi transport reconstituted with purified cytosolic proteins. *J. Cell Biol.* 139, 1097-1108.
- Bonifacino, J. S., and Glick, B. S. (2004). The mechanisms of vesicle budding and fusion. *Cell* 116, 153-66.
- Brunet, S., and Sacher, M. (2014). Are all multisubunit tethering complexes bona fide tethers? *Traffic* 15, 1282-1287.
- Cai, H., Yu, S., Menon, S., Cai, Y., Lazarova, D., Fu, C., Reinisch, K., Hay, J. C., and Ferro-Novick, S. (2007). TRAPPI tethers COPII vesicles by binding the coat subunit Sec23. *Nature* 445, 941-944.
- Cai, H., Zhang, Y., Pypaert, M., Walker, L., and Ferro-Novick, S. (2005). Mutants in *trs120* disrupt traffic from the early endosome to the late Golgi. *J. Cell Biol.* 171, 823-833.
- Cao, X., Ballew, N., and Barlowe, C. (1998). Initial docking of ER-derived vesicles requires Uso1p and Ypt1p but is independent of SNARE proteins. *EMBO J.* 17, 2156-2165.
- Cheung, P. Y., Limouse, C., Mabuchi, H., and Pfeffer, S. R. (2015). Protein flexibility is required for vesicle tethering at the Golgi. *eLife* 4, e12790.
- Cheung, P. Y., and Pfeffer, S. R. (2016). Transport Vesicle Tethering at the Trans Golgi Network: Coiled Coil Proteins in Action. *Front. Cell Dev. Biol.* 4, 18.
- Conibear, E., and Stevens, T. H. (2000). Vps52p, Vps53p, and Vps54p form a novel multisubunit complex required for protein sorting at the yeast late Golgi. *Mol. Biol. Cell* 11, 305-323.
- Drin, G., Morello, V., Casella, J. F., Gounon, P., and Antony, B. (2008). Asymmetric tethering of flat and curved lipid membranes by a golgin. *Science* 320, 670-673.
- Erickson, H. P. (2009). Size and shape of protein molecules at the nanometer level determined by sedimentation, gel filtration, and electron microscopy. *Biol. Proced. Online* 11, 32-51.
- Furukawa, N., and Mima, J. (2014). Multiple and distinct strategies of yeast SNAREs to confer the specificity of membrane fusion. *Sci. Rep.* 4, 4277.
- Gillingham, A. K., and Munro, S. (2019). Transport carrier tethering - how vesicles are captured by organelles. *Curr. Opin. Cell Biol.* 59, 140-146.
- Guo, W., Roth, D., Walch-Solimena, C., and Novick, P. (1999). The exocyst is an effector for Sec4p, targeting secretory vesicles to sites of exocytosis. *EMBO J.* 18, 1071-1080.
- Hickey, C. M., and Wickner, W. (2010). HOPS initiates vacuole docking by tethering membranes before trans-SNARE complex assembly. *Mol. Biol. Cell* 21, 2297-2305.
- Ho, R., and Stroupe, C. (2015). The HOPS/class C Vps complex tethers membranes by binding to one Rab GTPase in each apposed membrane. *Mol. Biol. Cell* 26, 2655-2663.
- Ho, R., and Stroupe, C. (2016). The HOPS/Class C Vps Complex Tethers High-Curvature Membranes via a Direct Protein-Membrane Interaction. *Traffic* 17, 1078-1090.
- Hutagalung, A. H., and Novick, P. J. (2011). Role of Rab GTPases in membrane traffic and cell physiology. *Physiol. Rev.* 91, 119-149.
- Inoshita, M., and Mima, J. (2017). Human Rab small GTPase- and class V myosin-mediated membrane tethering in a chemically defined reconstitution system. *J. Biol. Chem.* 292, 18500-18517.
- Izawa, R., Onoue, T., Furukawa, N., and Mima, J. (2012). Distinct contributions of vacuolar Qabc- and R-SNARE proteins to membrane fusion specificity. *J. Biol. Chem.* 287, 3445-3453.
- Jahn, R., and Scheller, R. H. (2006). SNAREs--engines for membrane fusion. *Nat. Rev. Mol. Cell Biol.* 7, 631-643.
- Khan, A. R., and Ménétrey, J. (2013). Structural biology of Arf and Rab GTPases' effector recruitment and specificity. *Structure* 21, 1284-1297.
- Klumperman, J., and Raposo, G. (2014). The complex ultrastructure of the endolysosomal system. *Cold Spring Harb. Perspect. Biol.* 6, a016857.
- Kuhlee, A., Raunser, S., and Ungermann, C. (2015). Functional homologies in vesicle tethering. *FEBS Lett.* 589, 2487-2497.
- Lo, S. Y., Brett, C. L., Plemel, R. L., Vignali, M., Fields, S., Gonen, T., and Merz, A. J. (2012). Intrinsic tethering activity of endosomal Rab proteins. *Nat. Struct. Mol. Biol.* 19, 40-47.
- Mayer, A., and Wickner, W. (1997). Docking of yeast vacuoles is catalyzed by the Ras-like GTPase Ypt7p after symmetric priming by Sec18p (NSF). *J. Cell Biol.* 136, 307-317.
- McNew, J. A., Parlati, F., Fukuda, R., Johnston, R. J., Paz, K., Paumet, F., Söllner, T. H., and Rothman, J. E. (2000). Compartmental specificity of cellular membrane fusion encoded in SNARE proteins. *Nature* 407, 153-159.
- Mima, J. (2018). Reconstitution of membrane tethering mediated by Rab-family small GTPases. *Biophys. Rev.* 10, 543-549.
- Murray, D. H., Jahnel, M., Lauer, J., Avellaneda, M. J., Brouilly, N., Cezanne, A., Morales-Navarrete, H., Perini, E. D., Ferguson, C., Lupas, A. N., Kalaidzidis, Y., Parton, R. G., Grill, S. W., and Zerial, M. (2016). An endosomal tether undergoes an entropic collapse to bring vesicles together. *Nature* 537, 107-111.
- Nagle, J. F., and Tristram-Nagle, S. (2000). Structure of lipid bilayers. *Biochim. Biophys. Acta* 1469, 159-195.
- Parlati, F., Varlamov, O., Paz, K., McNew, J. A., Hurtado, D., Söllner,

## HVR controls Rab-mediated membrane tethering

- T. H., and Rothman, J. E. (2002). Distinct SNARE complexes mediating membrane fusion in Golgi transport based on combinatorial specificity. *Proc. Natl. Acad. Sci. U. S. A.* 99, 5424-5429.
- Pérez-Victoria, F. J., and Bonifacino, J. S. (2009). Dual roles of the mammalian GARP complex in tethering and SNARE complex assembly at the trans-golgi network. *Mol. Cell Biol.* 29, 5251-5263.
- Pérez-Victoria, F. J., Mardones, G. A., and Bonifacino, J. S. (2008). Requirement of the human GARP complex for mannose 6-phosphate-receptor-dependent sorting of cathepsin D to lysosomes. *Mol. Biol. Cell* 19, 2350-2362.
- Pfeffer, S. R. (1999). Transport-vesicle targeting: tethers before SNAREs. *Nat. Cell Biol.* 1, E17-E22.
- Price, A., Seals, D., Wickner, W., and Ungermann, C. (2000). The docking stage of yeast vacuole fusion requires the transfer of proteins from a cis-SNARE complex to a Rab/Ypt protein. *J. Cell Biol.* 148, 1231-1238.
- Pylypenko, O., Hammich, H., Yu, I. M., and Houdusse, A. (2018). Rab GTPases and their interacting protein partners: Structural insights into Rab functional diversity. *Small GTPases* 9, 22-48.
- Reilly, B. A., Kraynack, B. A., VanRheenen, S. M., and Waters, M. G. (2001). Golgi-to-endoplasmic reticulum (ER) retrograde traffic in yeast requires Dsl1p, a component of the ER target site that interacts with a COPI coat subunit. *Mol. Biol. Cell* 12, 3783-3796.
- Ren, Y., Yip, C. K., Tripathi, A., Huie, D., Jeffrey, P. D., Walz, T., and Hughson, F. M. (2009). A structure-based mechanism for vesicle capture by the multisubunit tethering complex Dsl1. *Cell* 139, 1119-1129.
- Rojas, A. M., Fuentes, G., Rausell, A., and Valencia, A. (2012). The Ras protein superfamily: evolutionary tree and role of conserved amino acids. *J. Cell Biol.* 196, 189-201.
- Rossi, G., Lepore, D., Kenner, L., Czuchra, A. B., Plooster, M., Frost, A., Munson, M., and Brennwald, P. (2020). Exocyst structural changes associated with activation of tethering downstream of Rho/Cdc42 GTPases. *J. Cell Biol.* 219, e201904161.
- Sacher, M., Barrowman, J., Wang, W., Horecka, J., Zhang, Y., Pypaert, M., and Ferro-Novick, S. (2001). TRAPP I implicated in the specificity of tethering in ER-to-Golgi transport. *Mol. Cell* 7, 433-442.
- Sapperstein, S. K., Lupashin, V. V., Schmitt, H. D., and Waters, M. G. (1996). Assembly of the ER to Golgi SNARE complex requires Uso1p. *J. Cell Biol.* 132, 755-767.
- Sapperstein, S. K., Walter, D. M., Grosvenor, A. R., Heuser, J. E., and Waters, M. G. (1995). p115 is a general vesicular transport factor related to the yeast endoplasmic reticulum to Golgi transport factor Uso1p. *Proc. Natl. Acad. Sci. U. S. A.* 92, 522-526.
- Segawa, K., Tamura, N., and Mima, J. (2019). Homotypic and heterotypic trans-assembly of human Rab-family small GTPases in reconstituted membrane tethering. *J. Biol. Chem.* 294, 7722-7739.
- Shetakova, A., Zolov, S., and Lupashin, V. (2006). COG complex-mediated recycling of Golgi glycosyltransferases is essential for normal protein glycosylation. *Traffic* 7, 191-204.
- Spang, A. (2016). Membrane Tethering Complexes in the Endosomal System. *Front. Cell Dev. Biol.* 4, 35.
- Stenmark, H. (2009). Rab GTPases as coordinators of vesicle traffic. *Nat. Rev. Mol. Cell Biol.* 10, 513-525.
- Stroupe, C., Hickey, C. M., Mima, J., Burfeind, A. S., and Wickner, W. (2009). Minimal membrane docking requirements revealed by reconstitution of Rab GTPase-dependent membrane fusion from purified components. *Proc. Natl. Acad. Sci. U. S. A.* 106, 17626-17633.
- Takamori, S., Holt, M., Stenius, K., Lemke, E. A., Grønberg, M., Riedel, D., Urlaub, H., Schenck, S., Brügger, B., Ringler, P., Müller, S. A., Rammner, B., Gräter, F., Hub, J. S., De Groot, B. L., Mieskes, G., Moriyama, Y., Klingauf, J., Grubmüller, H., Heuser, J., Wieland, F., and Jahn, R. (2006). Molecular anatomy of a trafficking organelle. *Cell* 127, 831-846.
- Tamura, N., and Mima, J. (2014). Membrane-anchored human Rab GTPases directly mediate membrane tethering in vitro. *Biol. Open* 3, 1108-1115.
- Taniguchi, S., Toyoshima, M., Takamatsu, T., and Mima, J. (2020). Curvature-sensitive trans-assembly of human Atg8-family proteins in autophagy-related membrane tethering. *Protein Sci.* doi: 10.1002/pro.3828.
- TerBush, D. R., Maurice, T., Roth, D., and Novick, P. (1996). The Exocyst is a multiprotein complex required for exocytosis in *Saccharomyces cerevisiae*. *EMBO J.* 15, 6483-6494.
- Thomas, L. L., van der Vegt, S. A., and Fromme, J. C. (2019). A Steric Gating Mechanism Dictates the Substrate Specificity of a Rab-GEF. *Dev. Cell* 48, 100-114.
- Ungar, D., Oka, T., Brittle, E. E., Vasile, E., Lupashin, V. V., Chatterton, J. E., Heuser, J. E., Krieger, M., and Waters, M. G. (2002). Characterization of a mammalian Golgi-localized protein complex, COG, that is required for normal Golgi morphology and function. *J. Cell Biol.* 157, 405-415.
- Ungermann, C., Sato, K., and Wickner, W. (1998). Defining the functions of trans-SNARE pairs. *Nature* 396, 543-548.
- Vance, J. E. (2015). Phospholipid synthesis and transport in mammalian cells. *Traffic* 16, 1-18.
- van Meer, G., Voelker, D. R., and Feigenson, G. W. (2008). Membrane lipids: where they are and how they behave. *Nat. Rev. Mol. Cell Biol.* 9, 112-124.
- Waters, M. G., and Hughson, F. M. (2000). Membrane tethering and fusion in the secretory and endocytic pathways. *Traffic* 1, 588-597.
- Waters, M. G., and Pfeffer, S. R. (1999). Membrane tethering in intracellular transport. *Curr. Opin. Cell Biol.* 11, 453-459.
- Witkos, T. M., and Lowe, M. (2016). The Golgin Family of Coiled-Coil Tethering Proteins. *Front. Cell Dev. Biol.* 3, 86.
- Wong, M., and Munro, S. (2014). The specificity of vesicle traffic to the Golgi is encoded in the golgin coiled-coil proteins. *Science* 346, 1256898.
- Yang, Y., Lee, M., and Fairn, G. D. (2018). Phospholipid subcellular localization and dynamics. *J. Biol. Chem.* 293, 6230-6240.
- Yu, I. M., and Hughson, F. M. (2010). Tethering factors as organizers of intracellular vesicular traffic. *Annu. Rev. Cell Dev. Biol.* 26, 137-156.
- Zerial, M., and McBride, H. (2001). Rab proteins as membrane organizers. *Nat. Rev. Mol. Cell Biol.* 2, 107-117.
- Zink, S., Wenzel, D., Wurm, C. A., and Schmitt, H. D. (2009). A link between ER tethering and COP-I vesicle uncoating. *Dev. Cell* 17, 403-416.
- Zolov, S. N., and Lupashin, V. V. (2005). Cog3p depletion blocks vesicle-mediated Golgi retrograde trafficking in HeLa cells. *J. Cell Biol.* 168, 747-759.



## HVR controls Rab-mediated membrane tethering

**A**

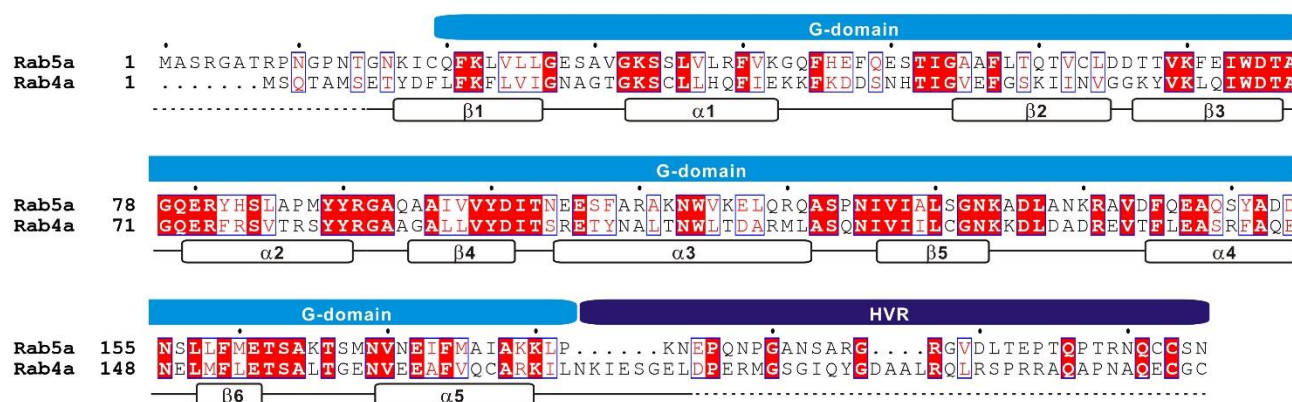

**B**

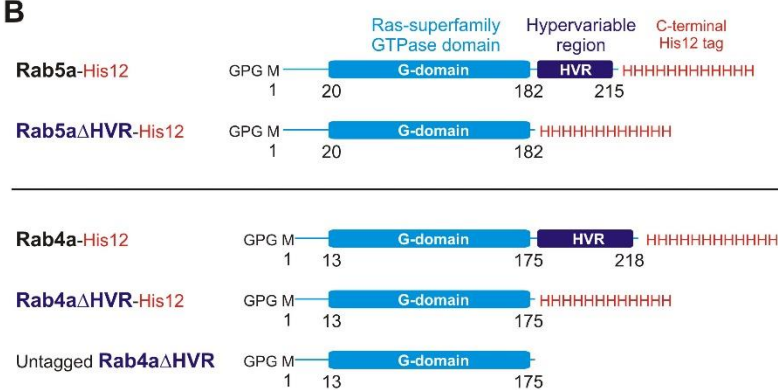

**C**

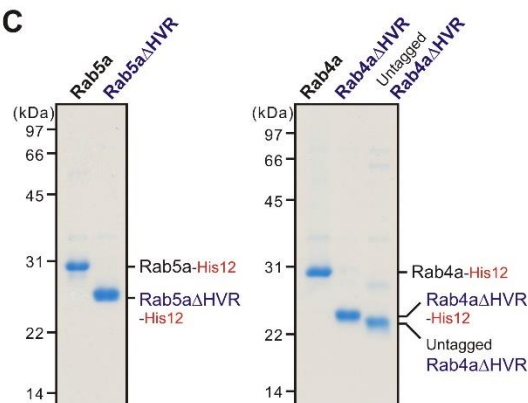

**Figure 1. Human endosomal Rab-family small GTPases used in the current reconstitution studies.** (A) Sequence alignment of human Rab5a and Rab4a proteins. Amino acid sequences of the two endosomal Rab isoforms were obtained from UniProtKB (<https://www.uniprot.org/>), aligned using ClustalW (<https://www.genome.jp/tools-bin/clustalw>), and rendered by ESPript 3.0 (<http://esprict.ibcp.fr/ESPript/ESPript/>). Identical and similar amino acid residues in the sequence alignment are highlighted in red boxes and in red characters, respectively. Sequence regions corresponding to the conserved Ras superfamily GTPase domain (G-domain) and the C-terminal hypervariable region (HVR) are indicated on the top of the alignment. Secondary structures determined by the crystal structure of human Rab5a containing the residues 15-184 (PDB code, 1N6H), including five  $\alpha$ -helices ( $\alpha 1$ - $\alpha 5$ ) and six  $\beta$ -strands ( $\beta 1$ - $\beta 6$ ), are indicated at the bottom of the alignment. (B) Schematic representation of recombinant proteins of human endosomal Rabs used in the current studies, which include the C-terminally His12-tagged forms of full-length Rab5a (Rab5a-His12), HVR-deleted mutant Rab5a (Rab5a $\Delta$ HVR-His12), full-length Rab4a (Rab4a-His12), and HVR-deleted mutant Rab4a (Rab4a $\Delta$ HVR-His12), and the untagged form of HVR-deleted mutant Rab4a (untagged Rab4a $\Delta$ HVR). All of the wild-type and mutant Rab proteins have only three extra residues (Gly-Pro-Gly) at the N-terminus after purification. (C) Coomassie blue-stained gels of purified Rab5a-His12, Rab5a $\Delta$ HVR-His12, Rab4a-His12, Rab4a $\Delta$ HVR-His12, and untagged Rab4a $\Delta$ HVR proteins, which were tested in the reconstituted liposome tethering assays in Figures 2-7.

## HVR controls Rab-mediated membrane tethering

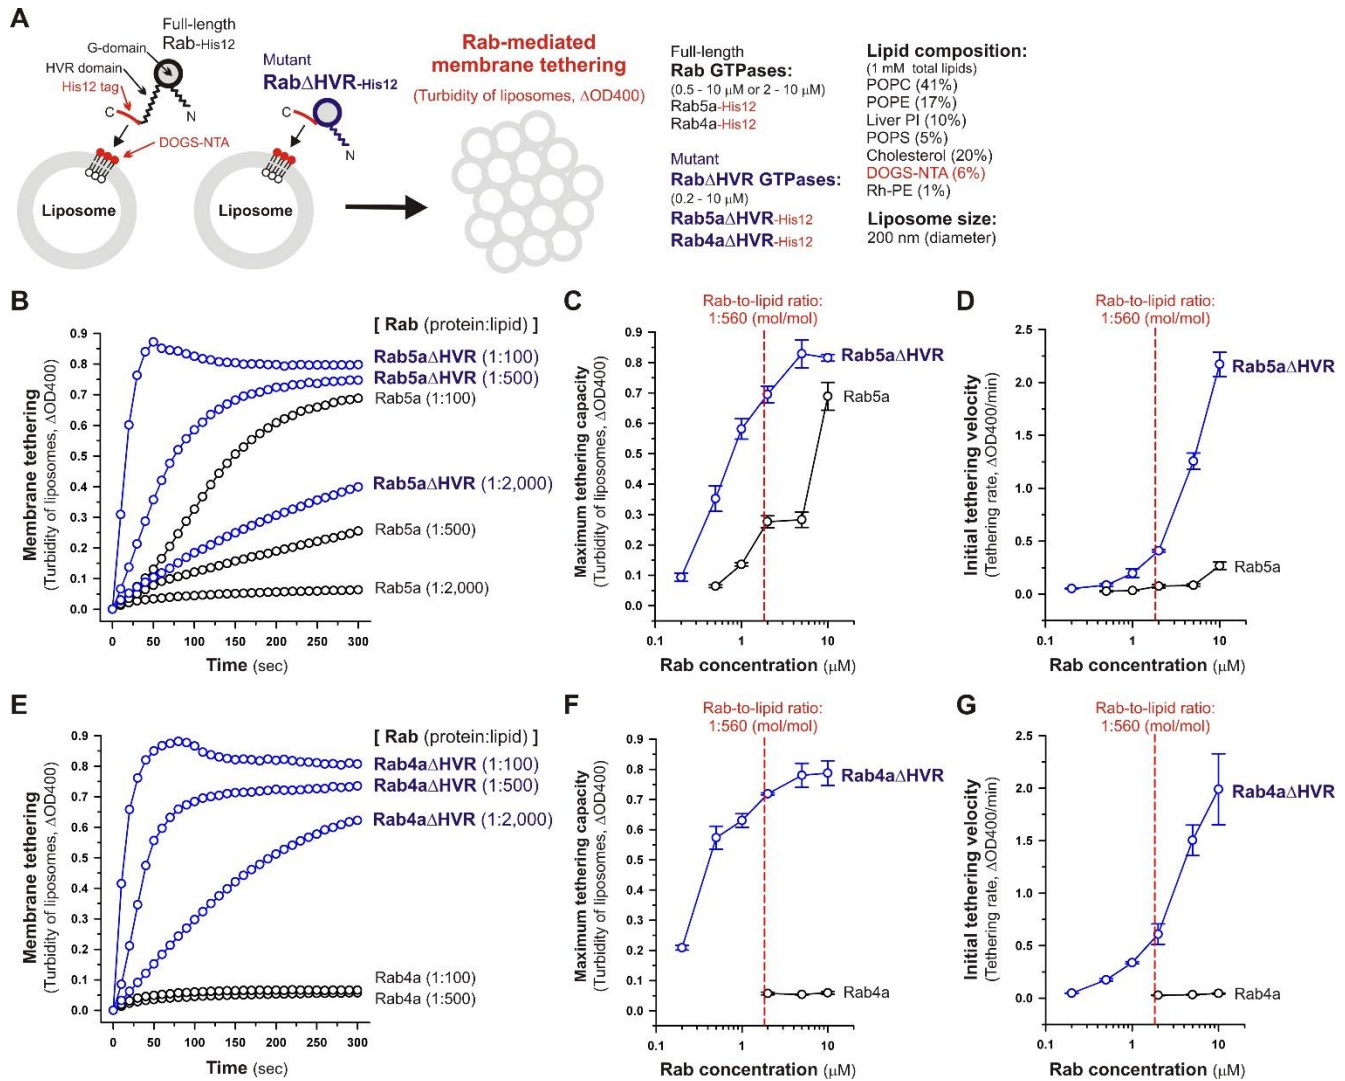

**Figure 2. Deletion of the flexible HVR linkers drastically enhances membrane tethering potency of human Rab5a and Rab4a small GTPases.** (A) Schematic representation of membrane tethering assays for human endosomal Rab5a and Rab4a in a chemically-defined reconstitution system. (B-D) Kinetic liposome turbidity assays for Rab5a-mediated membrane tethering. Purified Rab5a-His12 (final 0.5-10  $\mu$ M) and Rab5a $\Delta$ HVR-His12 (final 0.2-10  $\mu$ M) were mixed with DOGS-NTA-bearing synthetic liposomes (200-nm diameter; final 1 mM total lipids) and immediately assayed for the turbidity changes by measuring the optical density at 400 nm ( $\Delta$ OD400) for 5 min (B). The kinetic turbidity data were further analyzed by a sigmoidal curve fitting method to determine the maximum tethering capacities (C) and the initial tethering velocities (D). (E-G) Kinetic liposome turbidity assays for Rab4a-mediated membrane tethering. Purified Rab4a-His12 (final 2-10  $\mu$ M) and Rab4a $\Delta$ HVR-His12 (final 0.2-10  $\mu$ M) were mixed with DOGS-NTA-bearing liposomes and assayed for the turbidity changes (E), as in (B). The kinetic turbidity data were analyzed by curve fitting, thereby determining the maximum capacities (F) and the initial velocities (G), as in (C, D). The Rab protein concentration at the physiological Rab-to-lipid molar ratio of 1:560 (mol/mol) is indicated as a red dashed line (C-D, F-G). Error bars, SD.

### HVR controls Rab-mediated membrane tethering

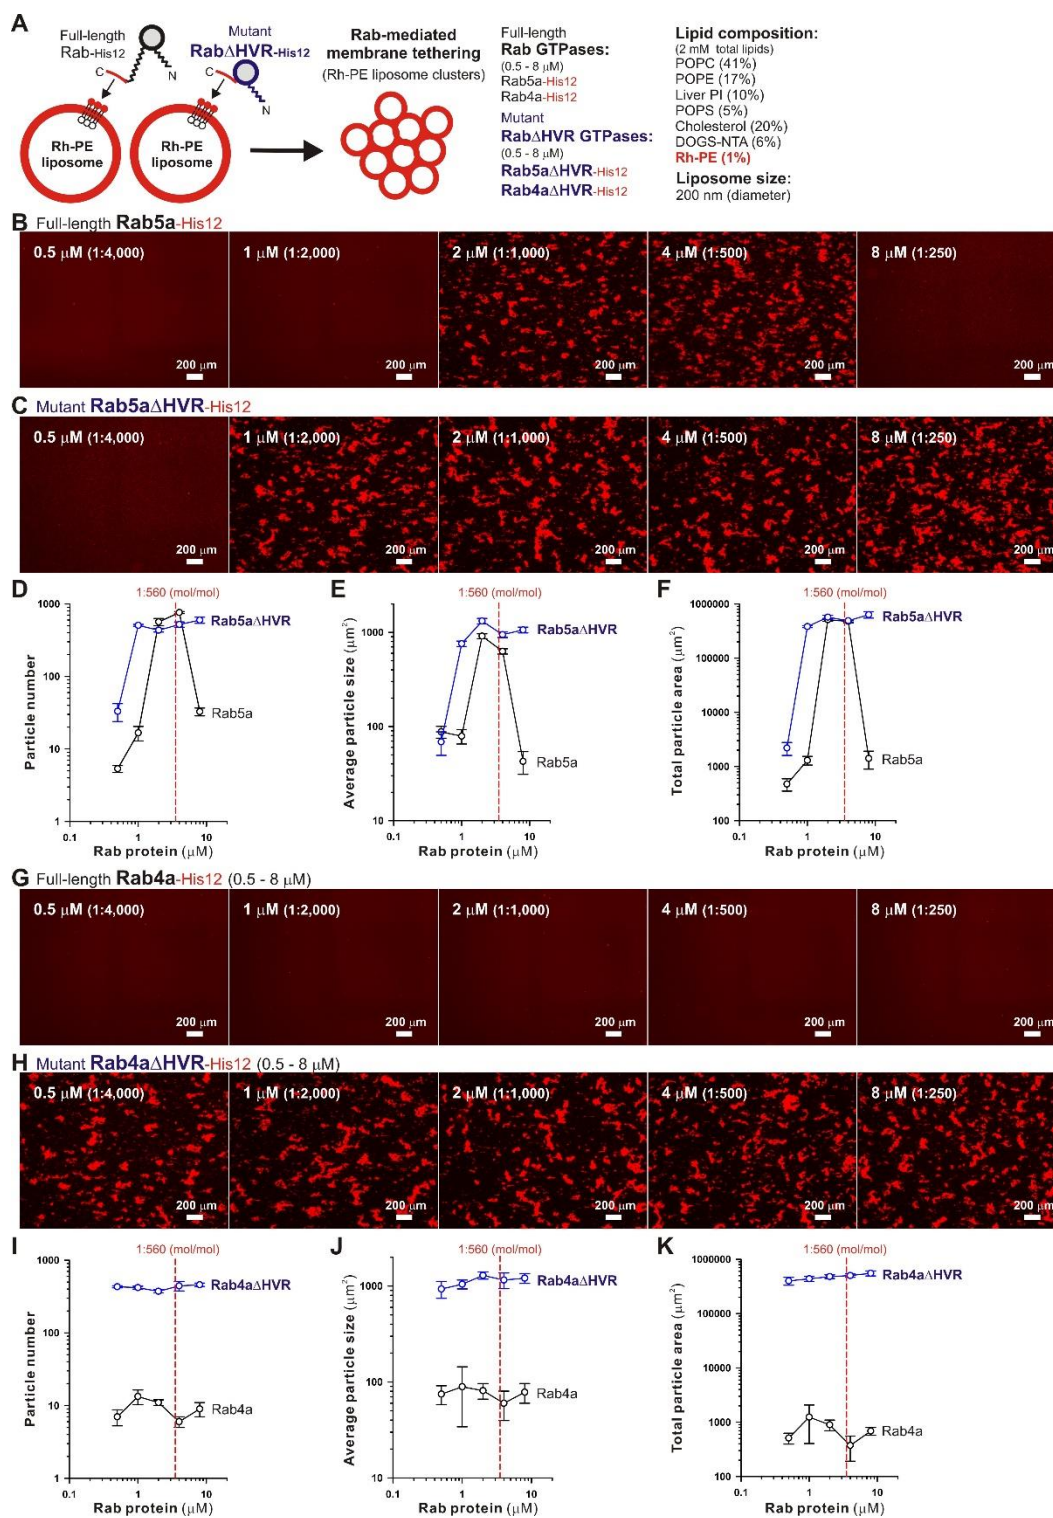

**Figure 3. Fluorescence microscopic analysis of membrane tethering driven by HVR-deleted Rab proteins.** (A) Schematic representation of fluorescence microscopy-based assays for membrane tethering driven by full-length and HVR-deleted forms of endosomal Rab5a and Rab4a. (B-K) Purified Rab5a-His12 (B), Rab5a $\Delta$ HVR-His12 (C), Rab4a-His12 (G), and Rab4a $\Delta$ HVR-His12 (H) proteins (final 0.5-8  $\mu$ M) were mixed with fluorescence-labeled liposomes bearing Rh-PE and DOGS-NTA (200-nm diameter; final 2 mM total lipids), incubated (30°C, 2 hours), and subjected to fluorescence microscopy. Particle sizes of Rab-induced liposome clusters in the rhodamine fluorescence images obtained (B-C, G-H) were measured using the ImageJ2 software, yielding means and SD values of the particle numbers (D, I), average particle sizes (E, J), and total particle areas (F, K), which were determined from three independent images of the Rab-mediated liposome tethering reactions. Scale bars, 200  $\mu$ m. Error bars, SD.

## HVR controls Rab-mediated membrane tethering

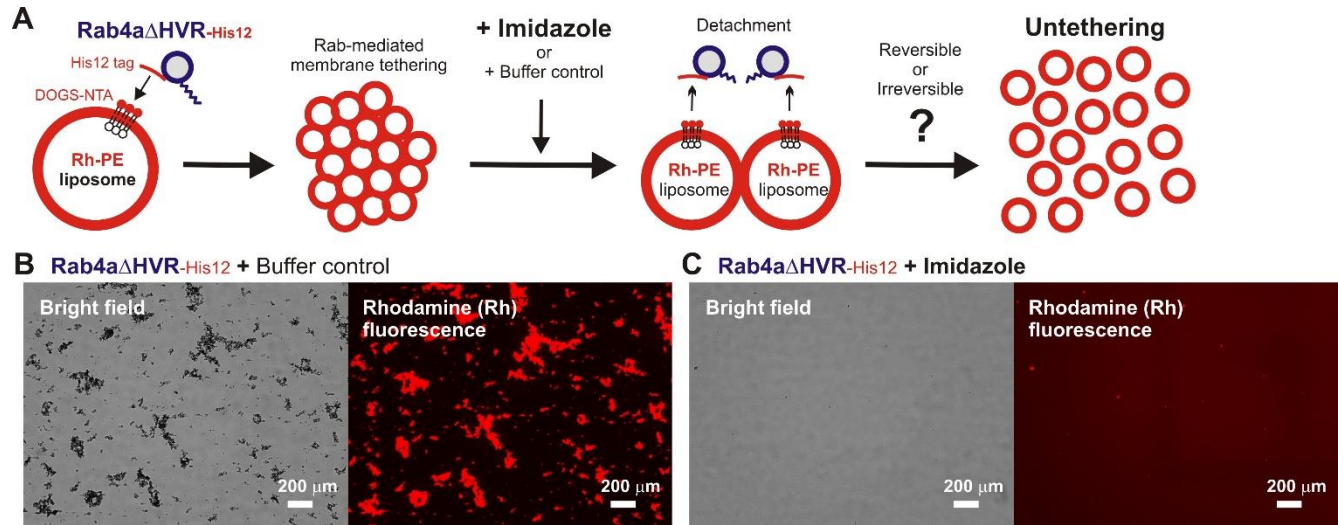

**Figure 4. HVR-deleted Rab4a drives a non-fusogenic, reversible membrane tethering reaction.** (A) Schematic representation of fluorescence microscopy-based assays testing the reversibility of reconstituted membrane tethering mediated by HVR-deleted mutant Rab4a. (B-C) Purified Rab4a $\Delta$ HVR-His12 (final 1 mM) and fluorescence-labeled liposomes bearing Rh-PE and DOGS-NTA (200-nm diameter; final 2 mM total lipids) were mixed and incubated (30°C, 1 hour) to induce the formation of Rab4a $\Delta$ HVR-mediated liposome clusters. After the first incubation, the liposome tethering reactions were supplemented with the buffer control (B) or imidazole (final 250 mM) which causes the dissociation of Rab4a $\Delta$ HVR-His12 proteins from DOGS-NTA-bearing liposomes (C), further incubated (30°C, 1 hour), and analyzed by fluorescence microscopy to obtain the bright field images and rhodamine fluorescence images. Scale bars, 200  $\mu$ m.

### HVR controls Rab-mediated membrane tethering

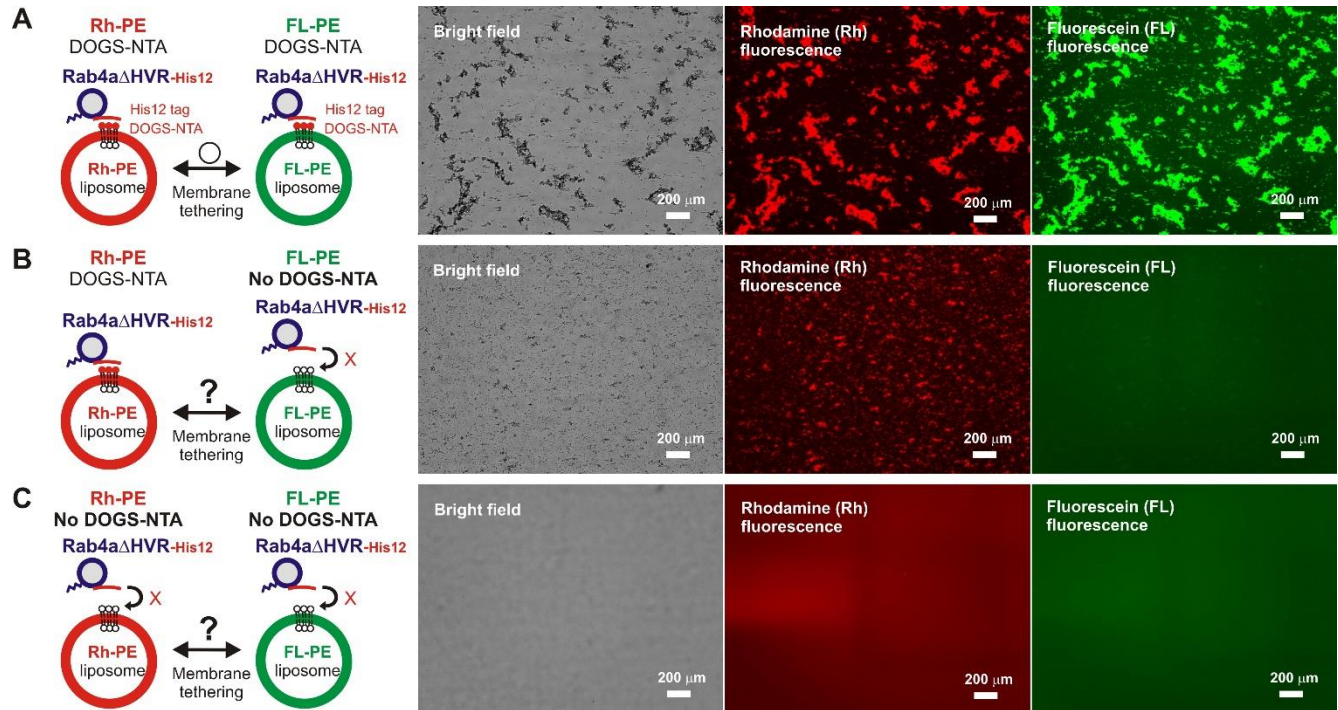

**Figure 5. *Trans*-assembly between membrane-anchored Rab proteins is required for membrane tethering mediated by HVR-deleted Rab4a.** (A-C) Fluorescence microscopy analysis of reconstituted membrane tethering driven by *trans*-assembly of membrane-anchored Rab4a $\Delta$ HVR proteins. Purified Rab4a $\Delta$ HVR-His12 (final 2  $\mu$ M) and two types of fluorescence-labeled liposomes, Rh-PE-bearing liposomes and FL-PE-bearing liposomes (200-nm diameter; final 1 mM total lipids for each), were mixed, incubated (30°C, 1 hour), and subjected to fluorescence microscopy, obtaining the bright field images (left panels), rhodamine fluorescence images (middle panels), and fluorescein fluorescence images (right panels). DOGS-NTA lipids for membrane anchoring of Rab4a $\Delta$ HVR-His12 proteins were present in both the Rh-PE and FL-PE liposomes (A), only in the Rh-PE liposomes (B), or not present in either of the liposomes (C). Scale bars, 200  $\mu$ m.

## HVR controls Rab-mediated membrane tethering

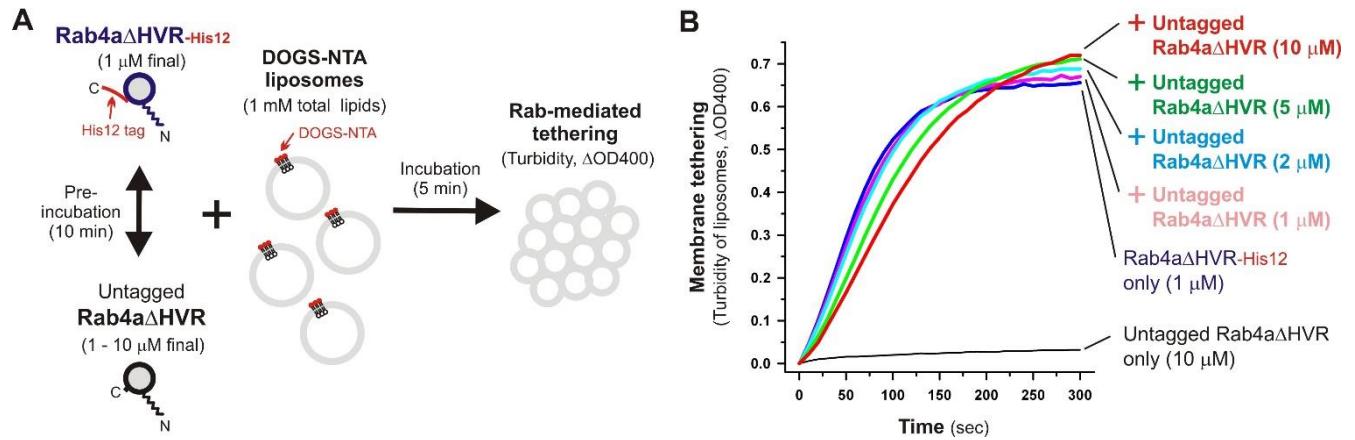

**Figure 6. Selective *trans*-assembly of HVR-deleted Rab4a proteins in reconstituted membrane tethering.** (A) Schematic representation of liposome turbidity assays in (B), testing the inhibitory effect of soluble untagged Rab4a $\Delta$ HVR proteins lacking a His12-tag membrane anchor on membrane tethering reactions driven by *trans*-assembly of membrane-anchored Rab4a $\Delta$ HVR-His12 proteins. (B) Rab4a $\Delta$ HVR-His12 proteins (final 1  $\mu$ M) were mixed with equimolar or excess amounts of untagged Rab4a $\Delta$ HVR proteins (final 1-10  $\mu$ M) and incubated at 30°C for 10 min. After pre-incubation, protein mixtures of Rab4a $\Delta$ HVR-His12 and untagged Rab4a $\Delta$ HVR were added to the suspensions containing DOGS-NTA-bearing liposomes (200-nm diameter; final 1 mM total lipids), immediately followed by monitoring the turbidity changes by measuring the optical density at 400 nm ( $\Delta$ OD400) for 5 min, as in Figure 2.

## HVR controls Rab-mediated membrane tethering

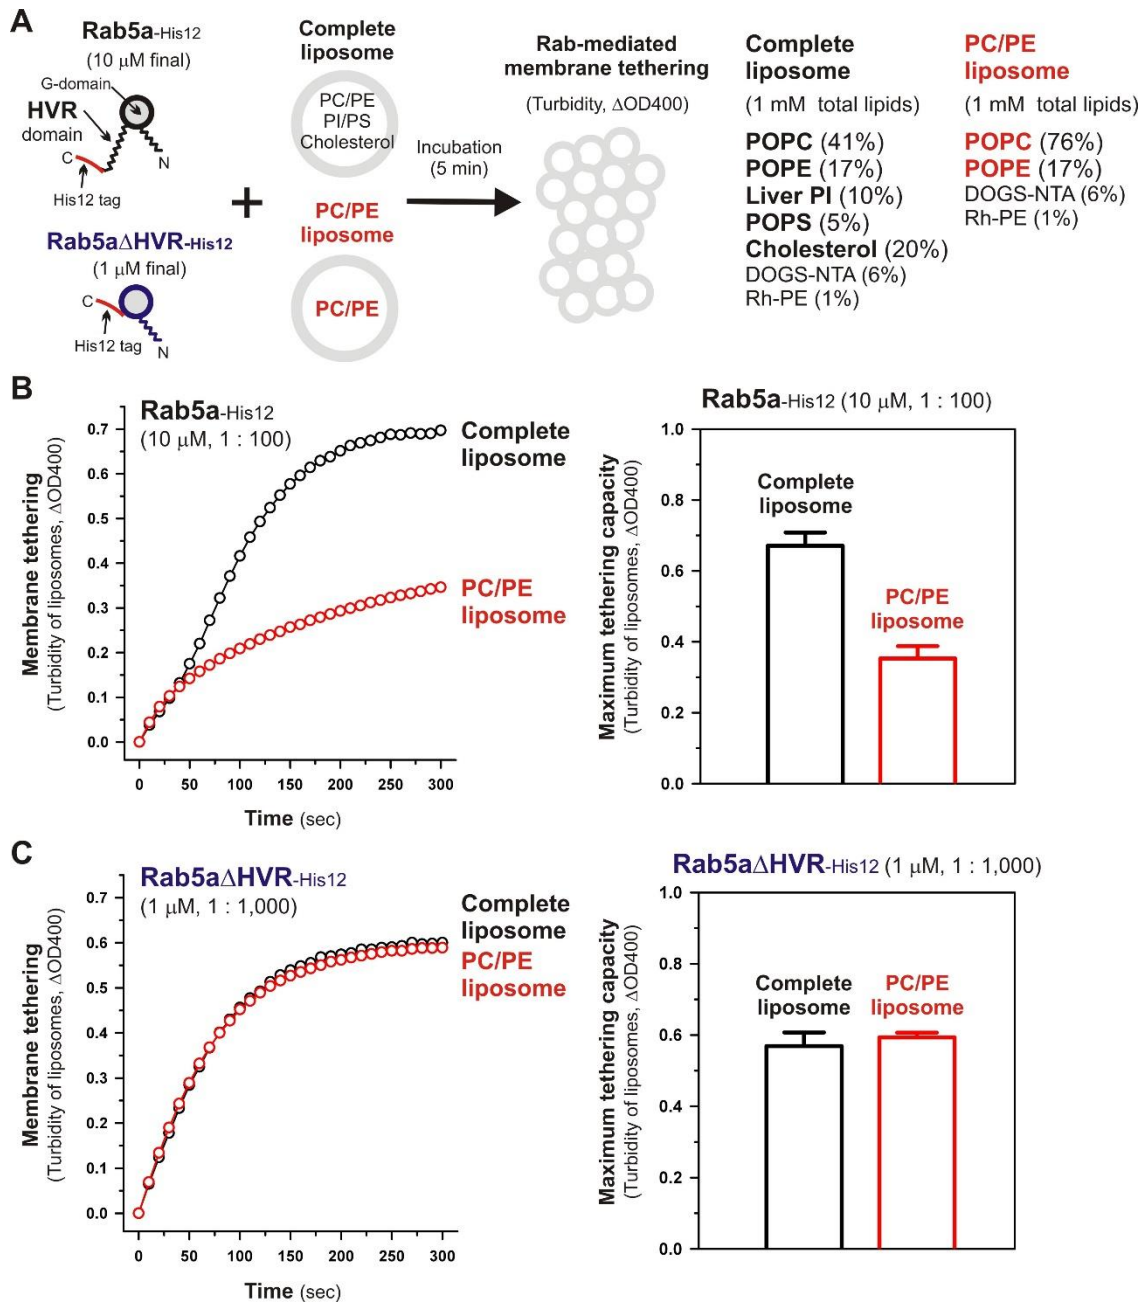

**Figure 7. Physiological complex lipid composition is crucial for efficient membrane tethering mediated by full-length Rab5a but not for HVR-deleted Rab5a-mediated membrane tethering.** (A) Schematic representation of liposome tethering assays in (B-C), testing the requirement of physiological complex lipid composition for Rab5a-mediated membrane tethering.

The complete liposomes, which were also used in Figures 2-6, contained PC, PE, PI, PS, and cholesterol, whereas the PC/PE liposomes bore only PC (76%, mol/mol) and PE (17%), in addition to DOGS-NTA and Rh-PE. (B) Full-length Rab5a-His12 proteins (final 10  $\mu$ M) were mixed with the complete liposomes or PC/PE liposomes (200-nm diameter; final 1 mM total lipids) and immediately assayed for the turbidity changes by measuring the optical density at 400 nm ( $\Delta$ OD400) for 5 min (left panel), as in Figure 2. The maximum tethering capacities of full-length Rab5a (right panel) were determined from the kinetic turbidity data, as in Figure 2. The maximum tethering capacities of full-length Rab5a for the complete liposomes are significantly different from those for the PC/PE liposomes ( $p < 0.001$ , calculated using one-way ANOVA). (C) Rab5a $\Delta$ HVR-His12 proteins (final 1  $\mu$ M) were mixed with the complete liposomes or PC/PE liposomes and then assayed for the turbidity changes (left panel), as in (B) for full-length Rab5a. The maximum tethering capacities of HVR-deleted Rab5a (right panel) were determined from the kinetic data, as in (B). Error bars, SD.
